# Supplementary material for: A Facile Two-Step Hydrothermal Synthesis of Co(OH)2@NiCo2O4 Nanosheet Nanocomposites for Supercapacitor Electrodes
Source: MDPI journal article supplement (doi:10.3390/nano13131981), 2023-06-30
Supplement: s1 [file s1]

## **Supplementary Materials**

# **A Facile Two-step Hydrothermal Synthesis of $\text{Co(OH)}_2@ \text{NiCo}_2\text{O}_4$ nanosheet Nanocomposites for Supercapacitor Electrodes**

**Hammad Mueen Arbi<sup>1,†</sup>, L. Vijayalakshmi<sup>2,†</sup>, Yedluri Anil Kumar<sup>3,4</sup>, Salem Alzahmi<sup>3,4,\*</sup>, Chandu V. V. Muralee Gopi<sup>5</sup>, Andrivo Rusydi<sup>6</sup>, and Ihab M. Obaidat<sup>1,4,\*</sup>**

<sup>1</sup> Department of Physics, United Arab Emirates University, Al Ain 15551, United Arab Emirates; 201990023@uaeu.ac.ae (H.M.A.); yedluri.anil@gmail.com (Y.A.K.)

<sup>2</sup> Department of Automotive Engineering, Yeungnam University, Gyeongsan-si, Republic of Korea; lvl.phy@gmail.com

<sup>3</sup> Department of Chemical & Petroleum Engineering, United Arab Emirates University, Al Ain 15551, United Arab Emirates

<sup>4</sup> National Water and Energy Center, United Arab Emirates University, Al Ain 15551, United Arab Emirates

<sup>5</sup> Department of Electrical Engineering, University of Sharjah, Sharjah P.O. Box 27272, United Arab Emirates; naga5673@gmail.com

<sup>6</sup> Advanced Research Initiative for Correlated-Electron Systems (ARiCES), Department of Physics, National University of Singapore, Singapore 117551, Singapore, phyandri@nus.edu.sg

\* Correspondence: s.alzahmi@uaeu.ac.ae (S.A.); iobaidat@uaeu.ac.ae (I.M.O.)

† These authors contributed equally to this work.

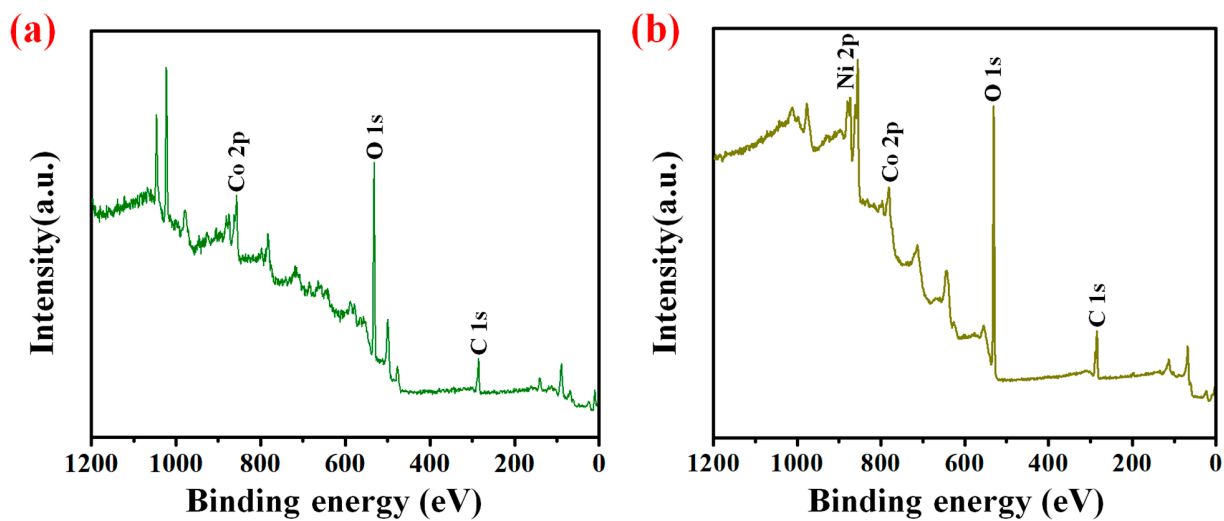

**Figure S1.** XPS full survey spectrums of (a)  $\text{Co(OH)}_2$  and (b)  $\text{NiCo}_2\text{O}_4$  electrode materials.

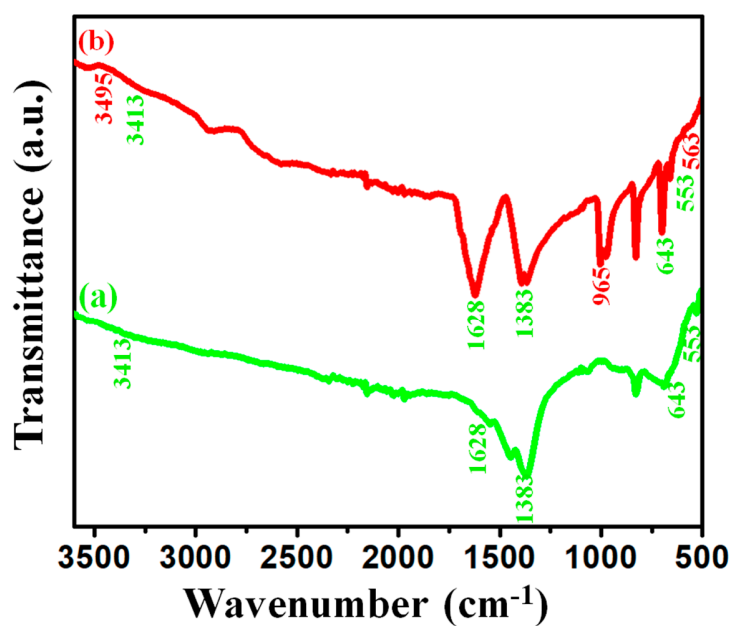

**Figure S2.** FTIR spectra of the as-prepared  $\text{NiCo}_2\text{O}_4$  electrode (a) and  $\text{Co(OH)}_2@ \text{NiCo}_2\text{O}_4$  nanosheets electrode (b).

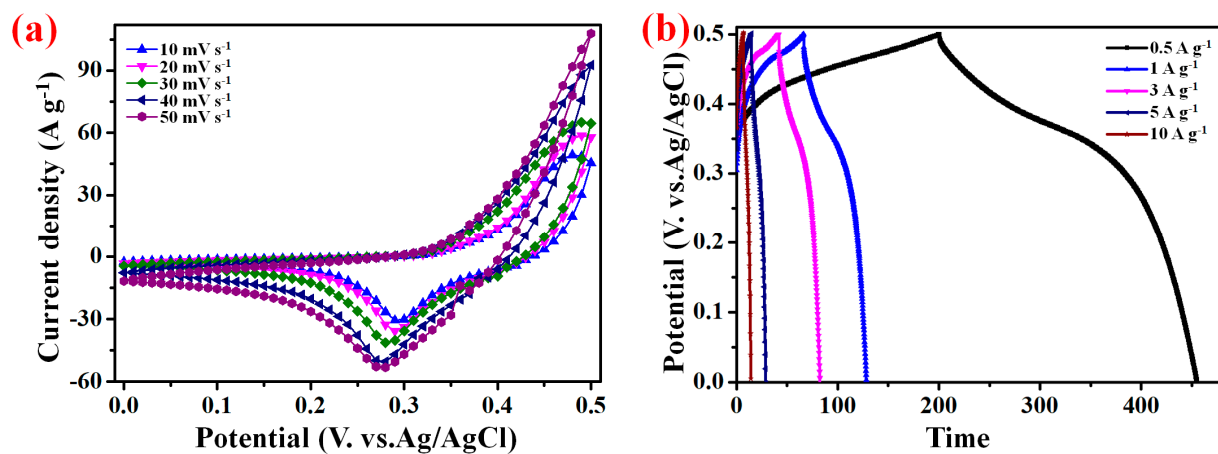

**Figure S3.** (a) CV curves and (b) CD plots of pure  $\text{NiCo}_2\text{O}_4$  electrode at various scan rates and different current densities grown on Ni foam.

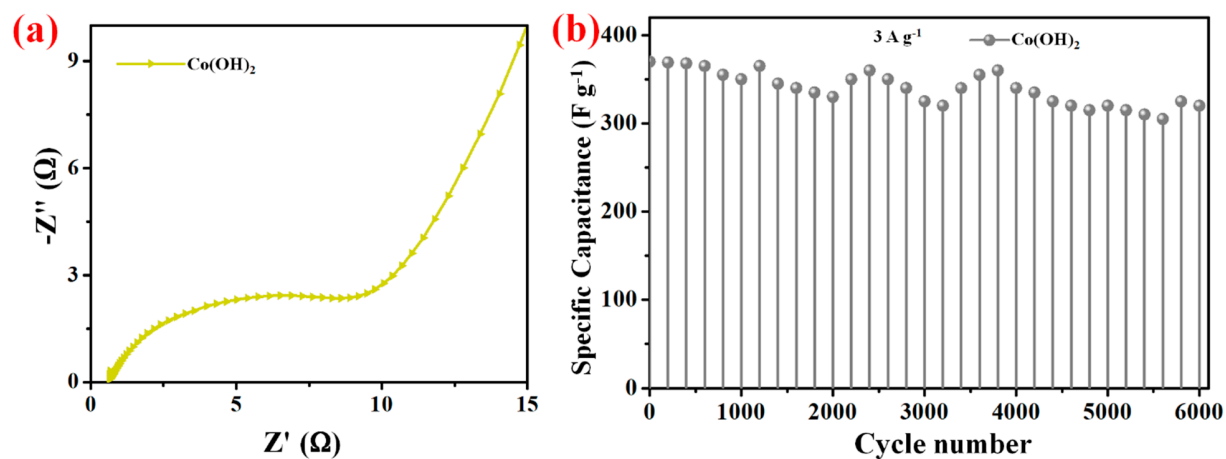

**Figure S4.** (a) Nyquist plots, and (b) Cycling stability of  $\text{Co(OH)}_2$  electrode in three-electrode electrochemical test.
